# Supplementary material for: Reflectance imaging spectroscopy and synchrotron radiation X-ray fluorescence mapping used in a technical study of The Blue Room by Pablo Picasso
Source: Springer Nature journal article supplement (doi:10.1186/s40494-017-0126-5), 2017-03-22
Supplement: 40494_2017_126_MOESM1_ESM.pdf [file 40494_2017_126_MOESM1_ESM.pdf]

Table A: Summary of findings of cross-sectional analysis

Analytical methods used:

*a* - SEM-EDX; *b* -  $\mu$ Raman; *c* -  $\mu$ FTIR; \* - Not analyzed;

Where no method is indicated, layer attribution is based on the overall data summary, including pXRF data and comparison to other layers

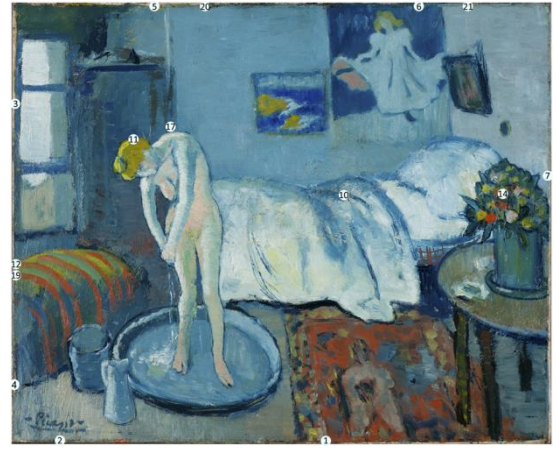

*The Blue Room* with locations of cross-section samples.

|  |                                                                                                                                                                                                                                                                                                                                                                                                                                                                                                                                                                                                                                                                                                      |
|--|------------------------------------------------------------------------------------------------------------------------------------------------------------------------------------------------------------------------------------------------------------------------------------------------------------------------------------------------------------------------------------------------------------------------------------------------------------------------------------------------------------------------------------------------------------------------------------------------------------------------------------------------------------------------------------------------------|
|  | <p>Red over black, from bottom edge, right of center (carpet)</p> <ol style="list-style-type: none"> <li>1. <i>Varnish</i></li> <li>2. <i>Beige</i> - zinc white<sup>b</sup> with barium sulfate<sup>c</sup> (larger, translucent white particles), Prussian blue<sup>b</sup> vermillion<sup>b</sup>, chrome yellow<sup>b</sup></li> <li>3. <i>Thin blue/green</i> – Prussian blue</li> <li>4. <i>Orange</i> – Vermilion<sup>a</sup> mixed with chrome yellow<sup>b</sup> and zinc white with barium sulfate</li> <li>5. <i>Light blue</i> – zinc white with barium sulfate, Prussian blue and vermillion</li> <li>6. <i>Black</i> - carbon black<sup>c</sup>, barium sulfate<sup>c</sup></li> </ol> |
|  | <p>Blue over red, from bottom edge at left, beneath signature (layers possibly altered during process of lining and/or re-stretching, c.1954)</p> <ul style="list-style-type: none"> <li>- <i>Yellow</i> - chrome yellow<sup>a,b</sup></li> <li>- <i>“Green”</i> (upper left) - chrome yellow<sup>a,b</sup>, Prussian blue<sup>b</sup>, carbon black<sup>b</sup></li> <li>- <i>Blue</i> - Prussian blue<sup>a,b</sup>, vermillion<sup>a,b</sup></li> <li>- <i>Red</i> – vermillion<sup>a,b</sup></li> <li>- Lead is detected in all layers, possibly as a drier<sup>a</sup></li> </ul>                                                                                                               |
|  | <p>Blue over yellow, from left edge near top (window frame)</p> <ol style="list-style-type: none"> <li>1. <i>Blue with red particles</i> – Prussian blue<sup>b</sup>, vermillion<sup>b</sup>, carbon black<sup>b</sup></li> <li>2. <i>Compound green</i> – carbon black (larger particles), chrome yellow<sup>b,c</sup>, with some Prussian blue<sup>b</sup> and vermillion<sup>b</sup></li> <li>3. <i>Yellow</i> - chrome yellow<sup>b,c</sup> mixed/extended with zinc white<sup>b</sup> and barium sulfate<sup>b,c</sup></li> </ol>                                                                                                                                                               |
|  | <p>Dark blue on white ground, taken from left edge near bottom</p> <ol style="list-style-type: none"> <li>1. <i>Varnish</i></li> <li>2. <i>White or light blue surface layer</i></li> <li>3. <i>Dark blue and white mixed wet-into-wet with small yellow and red particles throughout</i> – Prussian blue<sup>a,b</sup>, chrome yellow<sup>b</sup>, ivory or bone black<sup>a</sup>, vermillion</li> <li>4. <i>Ground</i> – lead white<sup>a</sup></li> </ol>                                                                                                                                                                                                                                        |

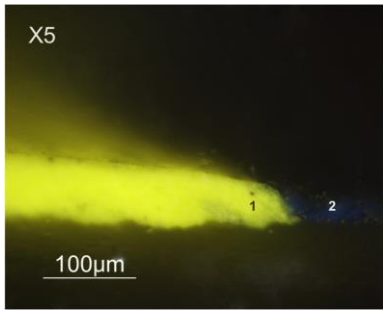

Blue over yellow, from top edge, near left

1. *Yellow* – chrome yellow<sup>b</sup>
2. *Blue* – Prussian blue<sup>b</sup>

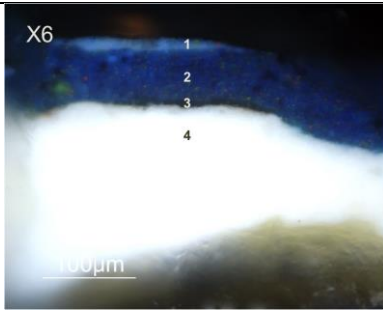

Light blue over medium blue, from top edge, right of center (poster)

1. *Light blue* – zinc white<sup>a,b</sup> with barium sulfate<sup>a,c</sup>, Prussian blue<sup>b</sup>
2. *Medium blue* – approx. 1:1 mix of Prussian blue with zinc white/barium sulfate
3. *Black* – ivory or bone black<sup>a</sup>
4. *White ground* – lead white<sup>b</sup> with gypsum<sup>b</sup>

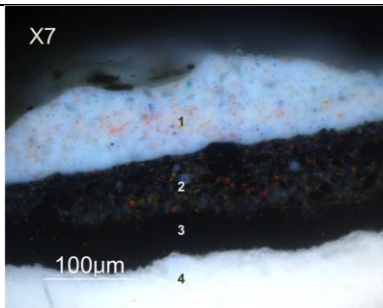

Light blue over dark blue, from right edge, near flowers

1. *Light blue* – zinc white<sup>b</sup> with barium sulfate<sup>c</sup>, scattered particles of Prussian blue<sup>b</sup>, vermilion<sup>b</sup>, and chrome yellow<sup>b</sup>
2. *Dark blue* – Prussian blue<sup>b</sup> and carbon black<sup>b</sup> with scattered particles of vermilion<sup>b</sup>
3. *Black*
4. *White ground* – lead white<sup>b</sup> with gypsum<sup>b</sup>

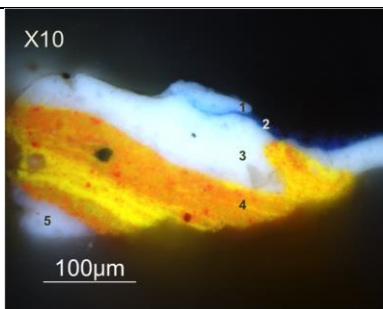

White/light blue over red, from center of bedcovers

1. *Light blue* – zinc white<sup>b</sup>, barium sulfate<sup>c</sup>, Prussian blue<sup>b</sup>
2. *Medium blue* – Prussian blue<sup>b</sup>
3. *White* – zinc white, barium sulfate<sup>b</sup>, Prussian blue<sup>b</sup>, vermilion<sup>b</sup>
4. *Red and yellow* (mixed wet-into-wet) – vermilion<sup>b</sup>, chrome yellow<sup>b,c</sup>, barium sulfate<sup>b</sup>
5. *White ground*

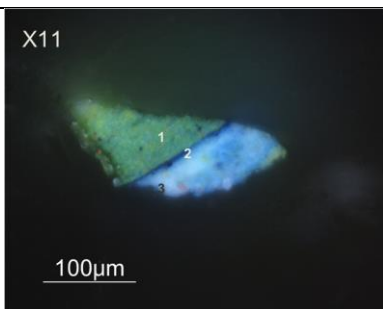

Yellow, from hair of bathing figure

1. *Light green* – cadmium yellow<sup>b</sup>, chrome yellow<sup>b</sup>, Prussian blue<sup>b</sup>, zinc white<sup>b</sup>, barium sulfate<sup>b</sup>
2. *Blue* – Prussian blue<sup>b</sup>
3. *Light blue* – Prussian blue<sup>b</sup>, chrome yellow<sup>b</sup>, cadmium yellow(?), zinc white(?), barium sulfate

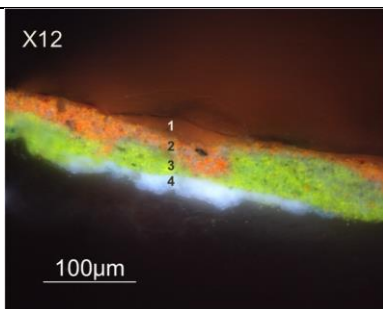

Yellow over red, from left edge, below center (sofa)

1. *Varnish*
2. *Red* – vermilion<sup>a,b</sup>, zinc white<sup>a,b</sup> with barium sulfate<sup>a,c</sup>, traces of Prussian blue<sup>b</sup>
3. *Yellow* – cadmium yellow<sup>a,b</sup>, chrome yellow<sup>a,b</sup>, Prussian blue<sup>b</sup>, zinc white with barium sulfate<sup>a,b</sup>
4. *White* – zinc white<sup>a,b</sup> with barium sulfate<sup>a,b</sup>

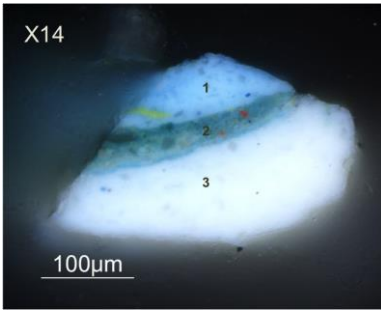

Green over light blue, from bouquet of flowers

1. *Light blue* – Prussian blue<sup>b</sup> zinc white<sup>b</sup> with barium sulfate<sup>b,c</sup>
2. *Blue-green* (lighter streaks indicate wet-into-wet mixing in this layer) – Prussian blue<sup>b</sup>, zinc white with barium sulfate<sup>b</sup>, vermilion<sup>b</sup>, emerald green<sup>a</sup>, cadmium yellow<sup>b</sup>
3. *White* (from the shirt in the underlying painting) – zinc white<sup>b</sup> with barium sulfate<sup>b</sup>

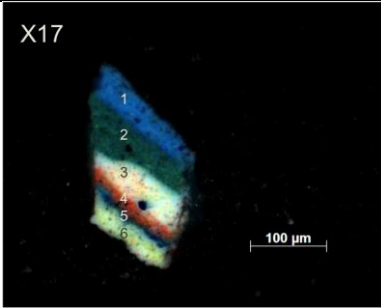

Blue over pale yellow, from above shoulder of bathing figure (near sitter's left eye in the portrait)

1. *Light blue* – Prussian blue<sup>a</sup> and zinc white<sup>a</sup> with barium sulfate<sup>a</sup>
2. *Green* – chrome yellow<sup>a</sup>, Prussian blue<sup>a</sup>, copper green<sup>a</sup> (possibly emerald green), barium sulfate
3. *White* – zinc white with barium sulfate
4. *Red* – vermilion<sup>a</sup>
5. *Blue* – Prussian blue
6. *White* – zinc white with barium sulfate

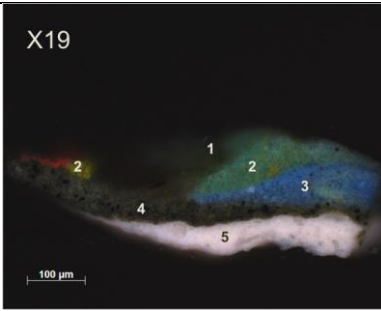

Light green over dark green from left edge, below center (sofa)

1. *Varnish*
2. *Red/Yellow/Green*
3. *Light blue*
4. *Compound green* – ivory black<sup>a</sup>, chrome yellow<sup>a</sup>, zinc white<sup>a</sup> with barium sulfate<sup>a</sup>
5. *White*

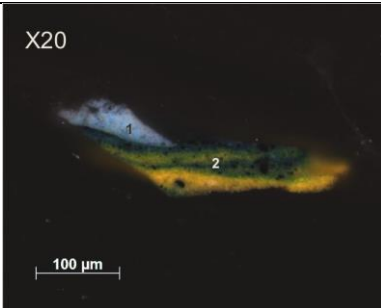

\*Light blue over yellow and dark blue, from top edge, left of center (sitter's left shoulder in portrait)

1. *Light blue*
2. *Dark blue and yellow mixed*
3. *Yellow*

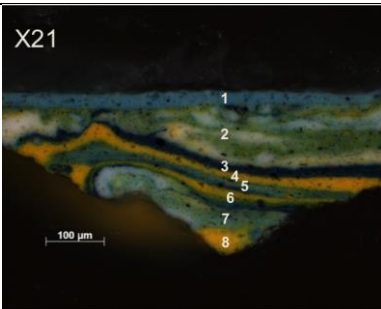

Top right edge; medium blue over mixed color

1. *Medium blue* – zinc white<sup>a</sup> with barium sulfate<sup>a</sup>, Prussian blue<sup>a</sup>
2. *Green and white mixed* – zinc white<sup>a</sup> with barium sulfate<sup>a</sup>, small amounts Prussian blue, chrome yellow<sup>a</sup>
3. *Dark blue* – Prussian blue
4. *Yellow* – chrome yellow
5. *Light blue* – Prussian blue, chrome yellow, zinc white with barium sulfate
6. *Blue and yellow mixed* – Prussian blue, chrome yellow
